# Supplementary material for: Oxidation mechanism of phenols by copper(ii)–halide complexes
Source: Royal Society of Chemistry journal article supplement (doi:10.1039/d4cc02483d), 2024-01-01
Supplement: d4cc02483d1.pdf [file d4cc02483d1.pdf]

**Supplementary Information (SI)**

**for**

**Oxidation Mechanism of Phenols by Copper(II)-halide Complexes**

**Lan Yang, Rin Ito, Hideki Sugimoto, Yuma Morimoto, and Shinobu Itoh\***

Department of Molecular Chemistry, Division of Applied Chemistry, Graduate School  
of Engineering, Osaka University, 2-1 Yamada-oka, Suita, Osaka 565-0871

E-mail: [shinobu@chem.eng.osaka-u.ac.jp](mailto:shinobu@chem.eng.osaka-u.ac.jp) (S. Itoh)

## Experimental

**1. General.** The reagents and solvents used in this study, except the ligand and the copper complexes, were commercial products of the highest available purity and used as received without further purification,<sup>1</sup> unless otherwise noted. The copper(II)-halide complexes **1<sup>F</sup>**, **1<sup>Cl</sup>**, **1<sup>Br</sup>**, **1<sup>I</sup>**, **2<sup>Cl</sup>**, and **2<sup>Br</sup>** were prepared according to the reported procedures.<sup>2-4</sup> Ligand TMG<sub>3</sub>tren was prepared according to the reported method.<sup>5</sup> All reactions were carried out under N<sub>2</sub> atmosphere using standard Schlenk technique or a glovebox (Miwa DB0-1KP or KK-011-AS, KOREA KIYON product, [O<sub>2</sub>] < 1 ppm). UV-visible spectra were taken on a Jasco V-570 or a Hewlett Packard 8453 photo diode array spectrophotometer equipped with a Unisoku thermostated cryostat cell holder USP-203. <sup>1</sup>H-NMR spectra were recorded on a JEOL JNM-ECS400 or a JEOL ECS400 spectrometer. Electrospray ionization mass spectra (ESI-MS) measurements were performed on a microTOF II focus (Bruker Daltonics). Matrix-assisted laser desorption/ionization time-of-flight (MALDI-TOF) mass spectra was taken on a JEOL JMS-S3000. Electron paramagnetic resonance (EPR) spectra were measured on a BRUKER EMX-micro continuous-wave X-band spectrometer, and simulated with the SpinCount program.<sup>6</sup>

**2. Kinetic Analysis.** Kinetic measurements for the reaction of copper(II) halide complexes **1<sup>X</sup>** with phenols **P<sup>X</sup>** were performed using a Hewlett Packard 8453 photo diode array spectrophotometer equipped with a Unisoku thermostated cryostat cell holder USP-203 (a desired temperature can be fixed within  $\pm 0.5^\circ\text{C}$ ) in CH<sub>3</sub>CN. Typically, the reaction of **1<sup>Br</sup>** with 2,4,6-tri-*tert*-butylphenol **P<sup>tBu</sup>** was initiated by adding a substrate solution into a CH<sub>3</sub>CN solution of **1<sup>Br</sup>** (0.25 mM) with use of a micro syringe at 0 °C. The reactions were monitored by following the decrease of absorption band at 410 nm due to **1<sup>Br</sup>**, and the pseudo-first-order-rate constants ( $k_{\text{obs}}$ ) of the reactions were obtained from the plot of  $\ln(\Delta A)$  against the reaction time ( $t$ ).

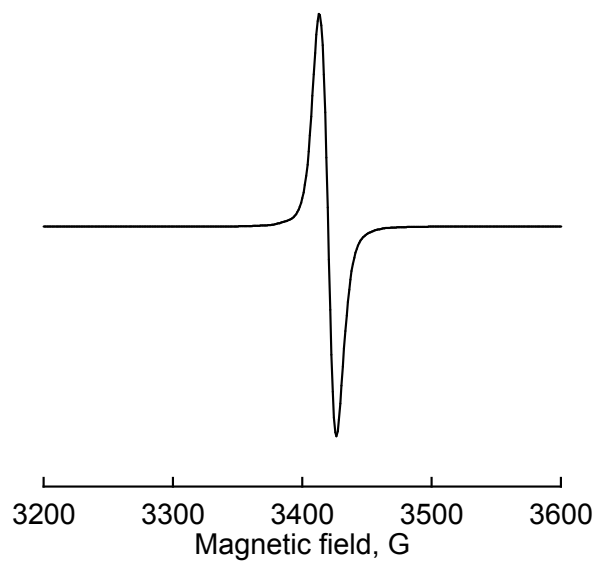

**Fig. S1** X-band EPR spectra of the post reaction solutions showing the existence of phenoxyl radical ( $\text{P}^t\text{Bu}\cdot$ ) at  $g = 2.0041$  in  $\text{CH}_2\text{Cl}_2$  at 104 K. For the reaction of  $\mathbf{1}^{\text{Br}}$  with  $\text{P}^t\text{BuH}$ .

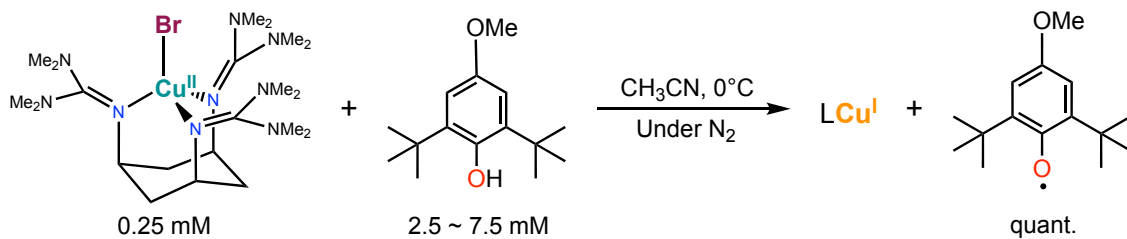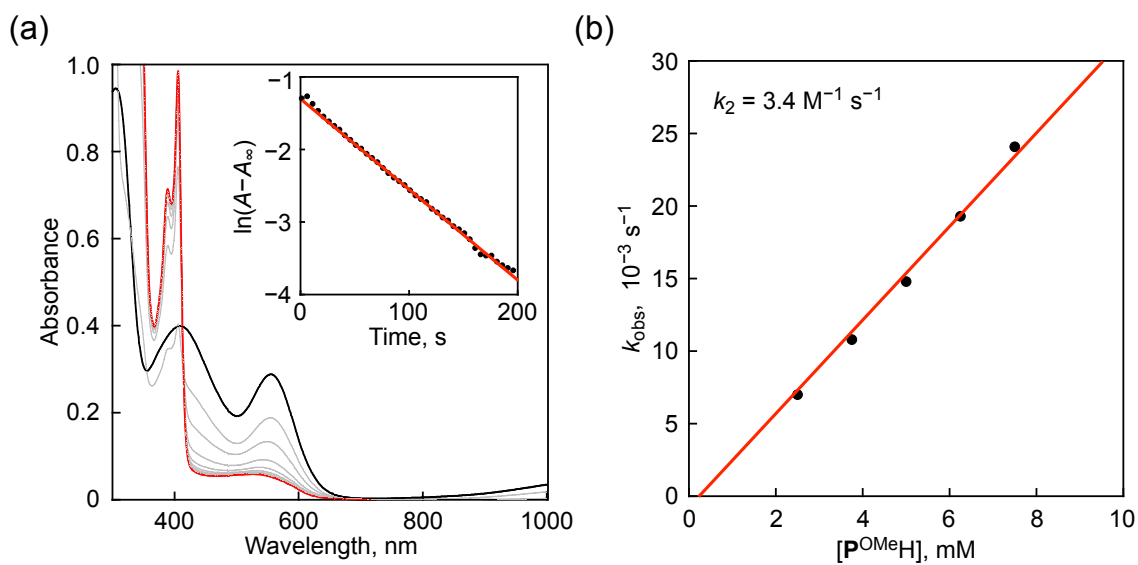

**Fig. S2** (a) UV-vis spectral change for the reaction of **1<sup>Br</sup>** (0.25 mM) with 4-OMe-2,6-di-*tert*-butylphenol (**P<sup>OMe</sup>H**, 5.0 mM) in CH<sub>3</sub>CN at 0°C. Inset: Pseudo first-order plots based on the absorption change at 560 nm. (b) Plot of  $k_{\text{obs}}$  vs. [**P<sup>OMe</sup>H**].

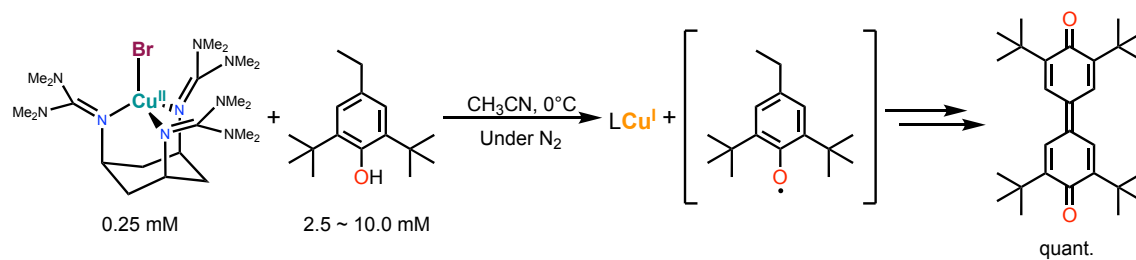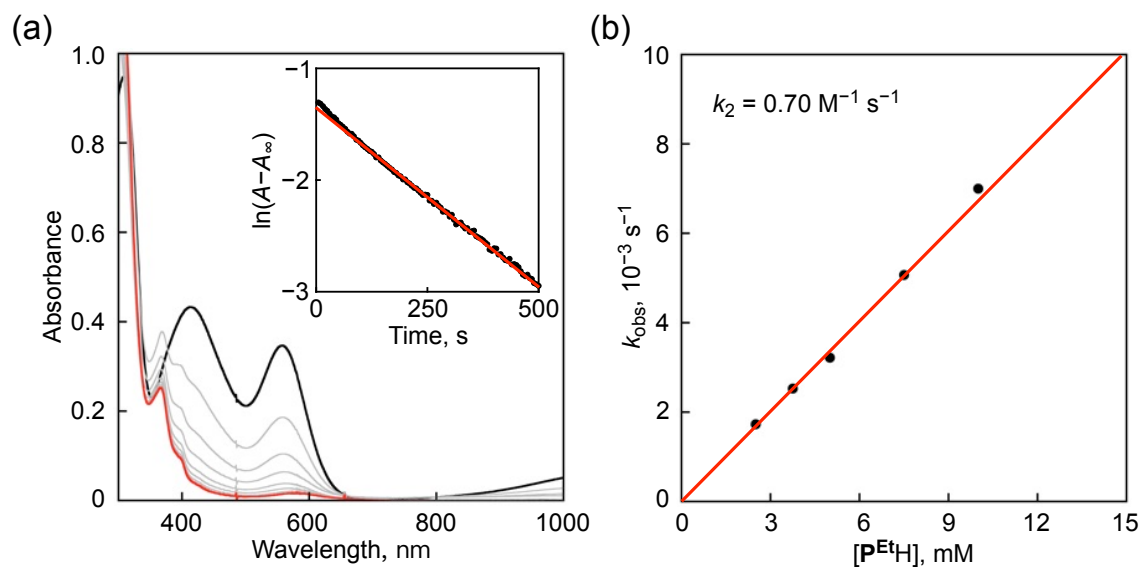

**Fig. S3** (a) UV-vis spectral changes for the reaction of **1<sup>Br</sup>** (0.25 mM) with 4-ethyl-2,6-di-*tert*-butylphenol (**P<sup>EtH</sup>**, 5.0 mM) in CH<sub>3</sub>CN at 0°C. Inset: Pseudo first-order plots based on the absorption change at 560 nm. (b) Plot of  $k_{\text{obs}}$  vs.  $[\text{P}^{\text{EtH}}]$ .

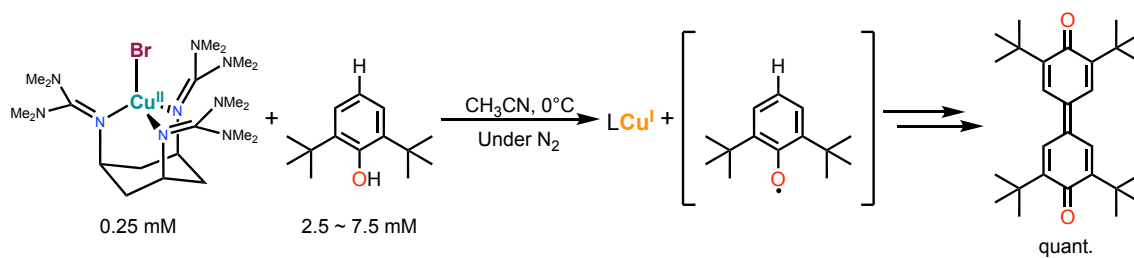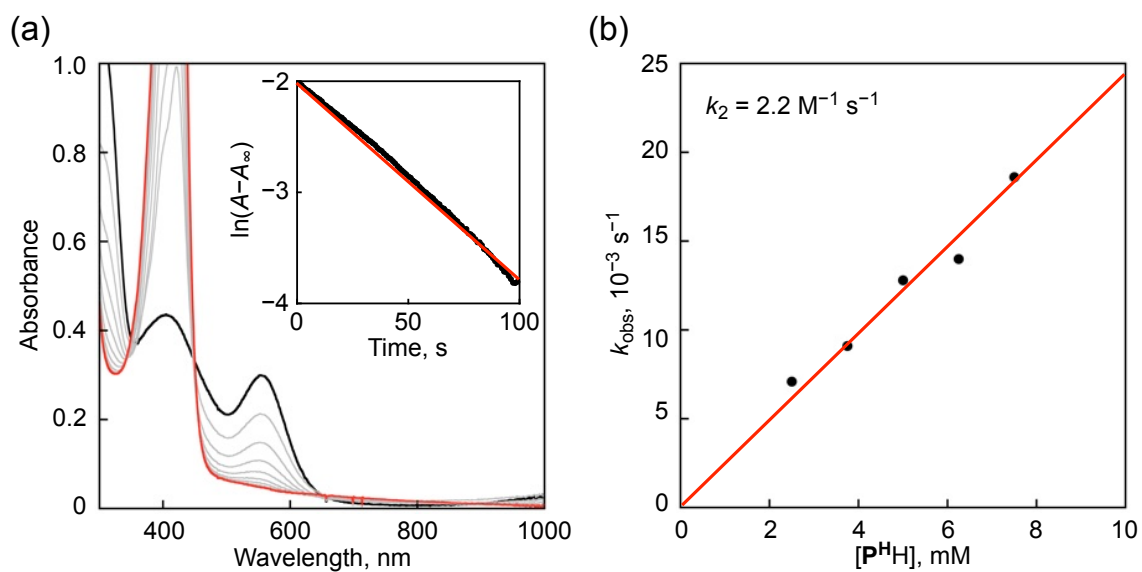

**Fig. S4** (a) UV-vis spectral changes for the reaction of  $1^{\text{Br}}$  (0.25 mM) with 2,6-di-*tert*-butylphenol ( $\text{P}^{\text{H}}\text{H}$ , 7.5 mM) in  $\text{CH}_3\text{CN}$  at  $0^\circ\text{C}$ . Inset: Pseudo first-order plots based on the absorption change at 560 nm. (b) Plot of  $k_{\text{obs}}$  vs.  $[\text{P}^{\text{H}}\text{H}]$ .

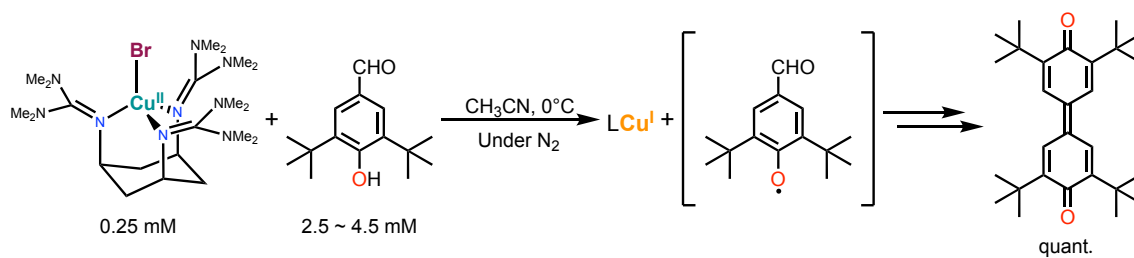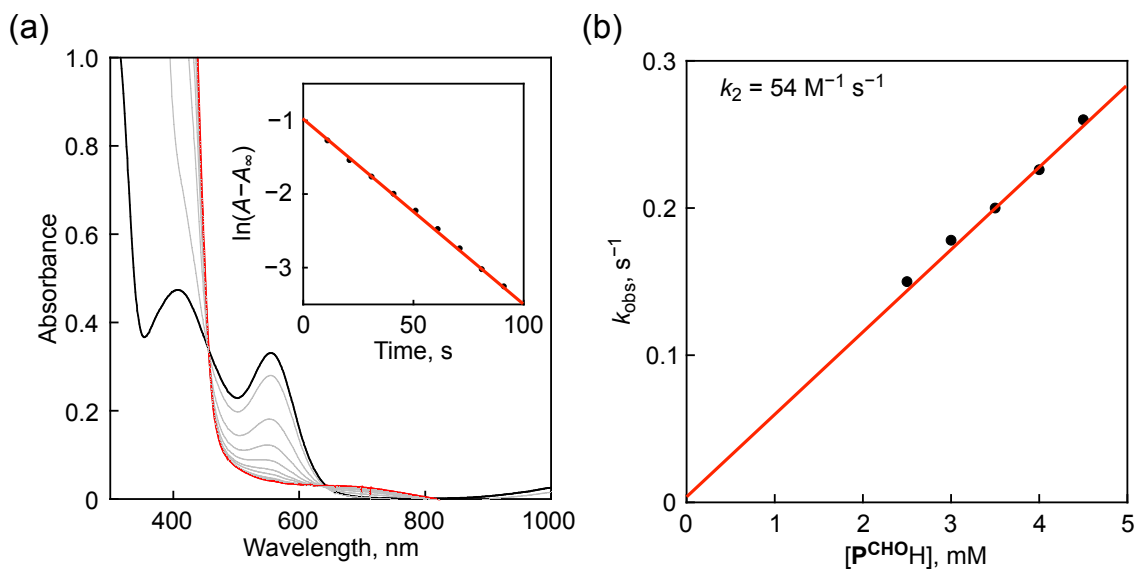

**Fig. S5** (a) UV-vis spectral changes for the reaction of  $\mathbf{1}^{\text{Br}}$  (0.25 mM) with 4-formyl-2,6-di-*tert*-butylphenol ( $\mathbf{P}^{\text{CHOH}}$ , 4.5 mM) in  $\text{CH}_3\text{CN}$  at  $0^\circ\text{C}$ . Inset: Pseudo first-order plots based on the absorption change at 560 nm. (b) Plot of  $k_{\text{obs}}$  vs.  $[\mathbf{P}^{\text{CHOH}}]$ .

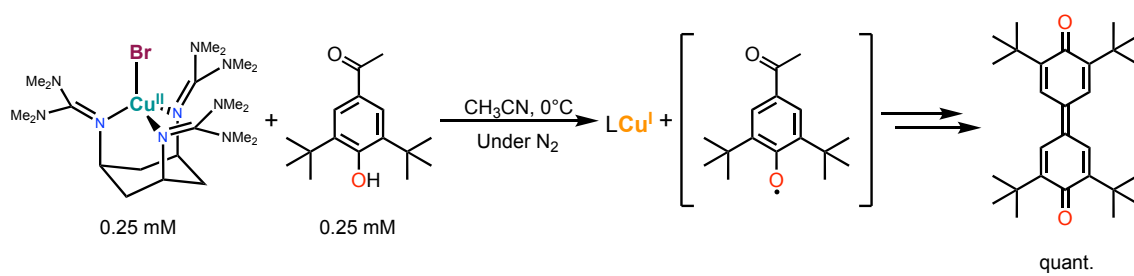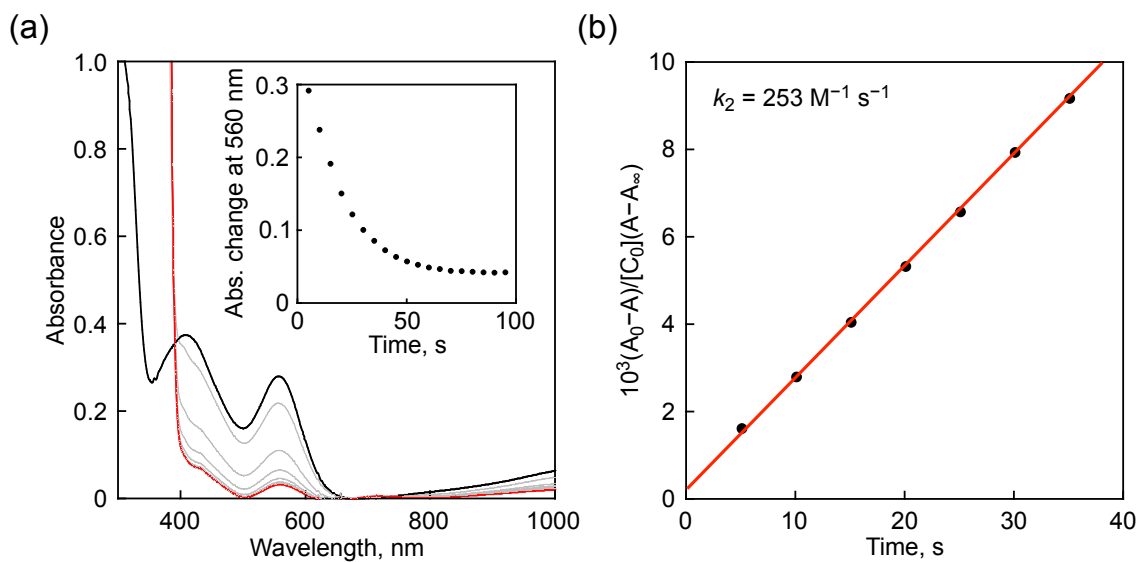

**Fig. S6** (a) UV-vis spectral changes for the reaction of  $\mathbf{1}^{\text{Br}}$  (0.25 mM) with 4-COMe-2,6-di-*tert*-butylphenol ( $\mathbf{P}^{\text{COMeH}}$ , 0.25 mM) in  $\text{CH}_3\text{CN}$  at  $0^\circ\text{C}$ . Inset: Absorption change at 560 nm. (b) Second-order plot based on the absorption change at 560 nm.



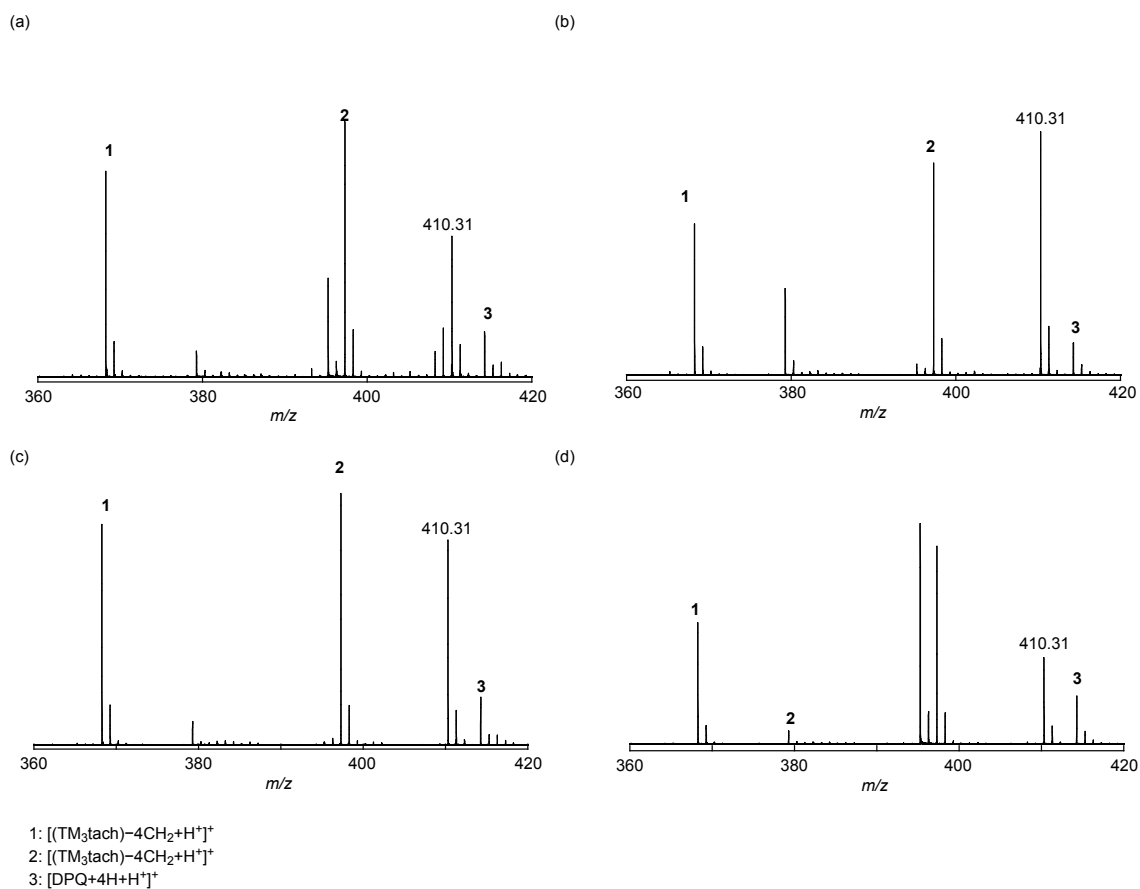

**Fig. S7** MALDI-TOF mass spectra of the post reaction solutions showing the formation of 3,3',5,5'-tetra-*tert*-butyl-[1,1'-bi(cyclohexylidene)]-2,2',5,5'-tetraene-4,4'-dione+2H<sup>+</sup> ( $m/z = 410.31$ ) in the reactions of **1<sup>Br</sup>** and **P<sup>Y</sup>H** 4-*Y*-2,6-di-*tert*-butylphenol; (a) *Y* = Et, (b) *Y* = H, (c) *Y* = CHO, and (d) *Y* = COMe.

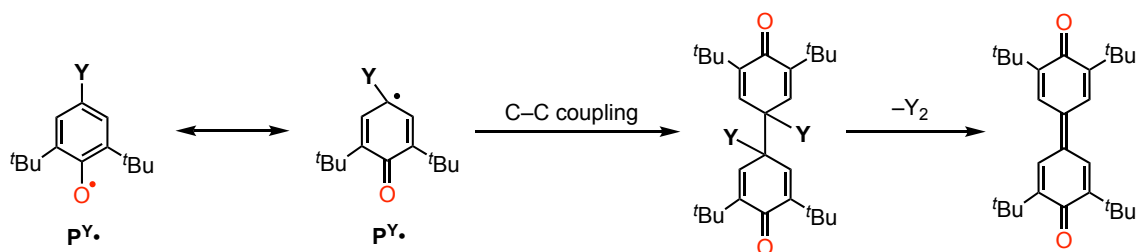

**Scheme S1** Formation of 3,3',5,5'-tetra-*tert*-butyl-[1,1'-bi(cyclohexylidene)]-2,2',5,5'-tetraene-4,4'-dione by the C–C coupling reaction of **P<sup>Y</sup>•**.

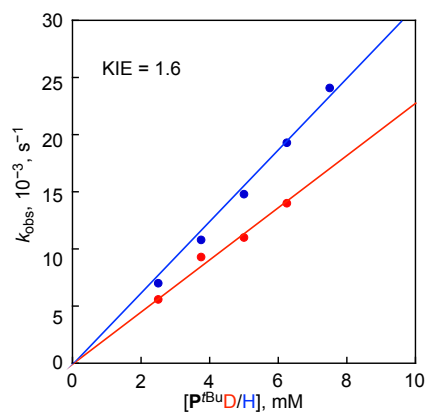

**Fig. S8** Plots of  $k_{\text{obs}}$  against phenol concentration for the reaction between  $\mathbf{1}^{\text{Br}}$  with  $\mathbf{P}^{\text{OMeH}}$  (blue) and  $\mathbf{P}^{\text{OMeD}}$  (red).

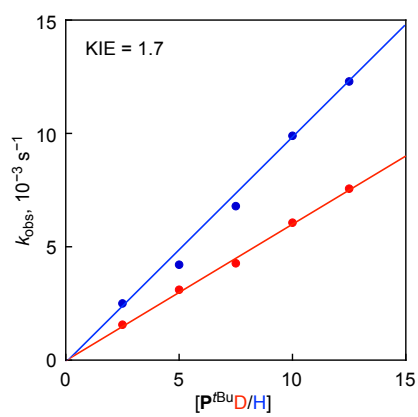

**Fig. S9** Plots of  $k_{\text{obs}}$  against phenol concentration for the reaction between  $\mathbf{1}^{\text{Br}}$  with  $\mathbf{P}^{\text{tBuH}}$  (blue) and  $\mathbf{P}^{\text{tBuD}}$  (red).

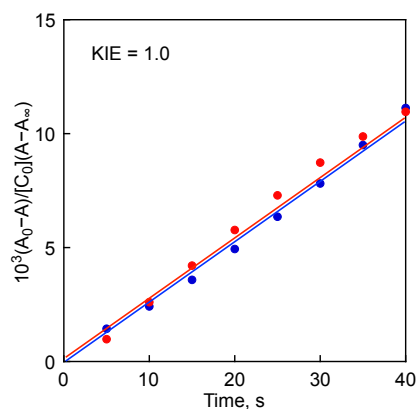

**Fig. S10** Second-order plot for the reaction between  $1^{Br}$  with  $P^{COMeH}$  (blue) and  $P^{COMeD}$  (red).

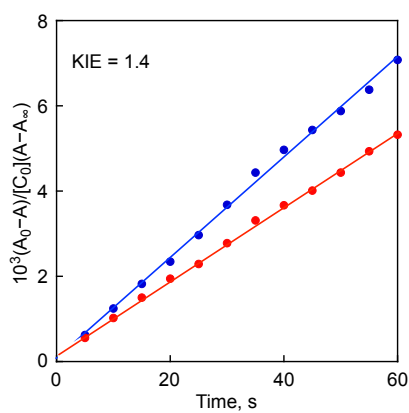

**Fig. S11** Second-order rate constant plot for the reaction between  $1^F$  with  $P^{COMeH}$  (blue) and  $P^{COMeD}$  (red).

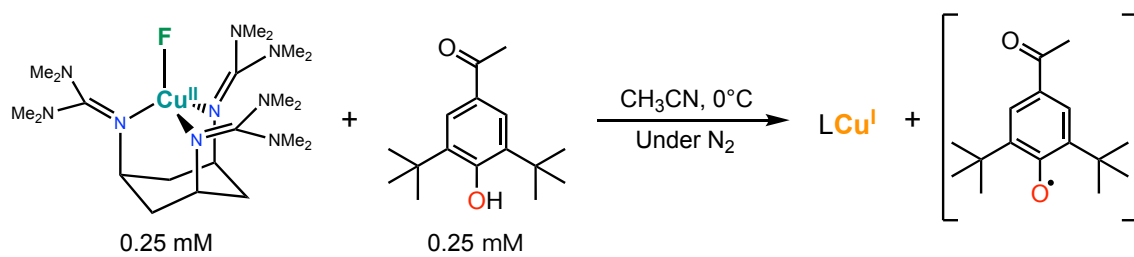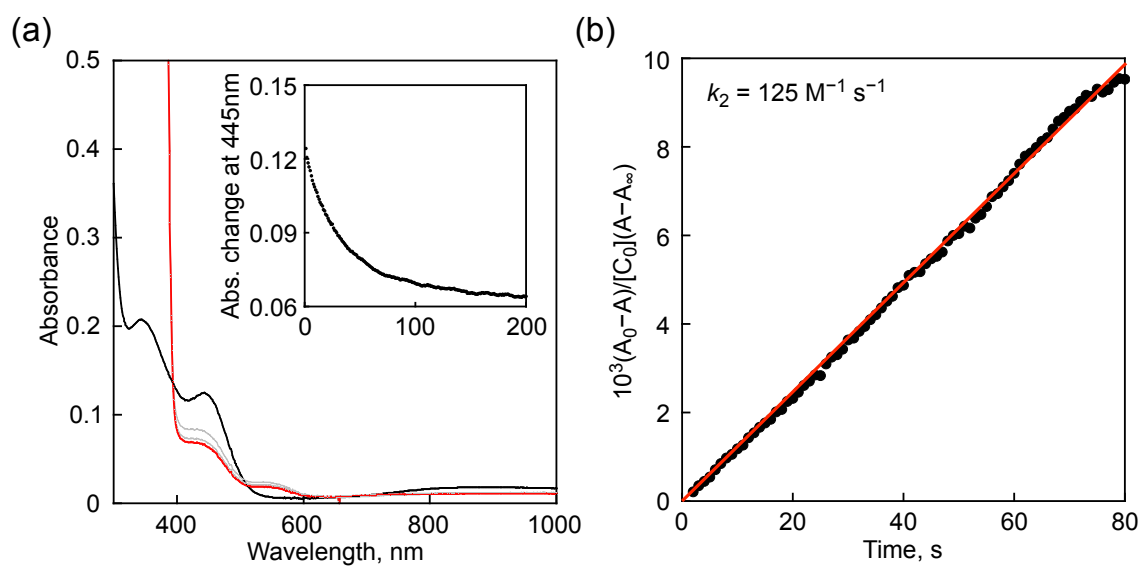

**Fig. S12** (a) UV-vis spectral changes for the reaction of **1<sup>F</sup>** (0.25 mM) with 4-COMe-2,6-di-*tert*-butylphenol (**P<sup>COMe</sup>H**, 0.25 mM) in CH<sub>3</sub>CN at 0°C. Inset: Absorption change at 445 nm. (b) Second-order plot based on the absorption change at 445 nm.

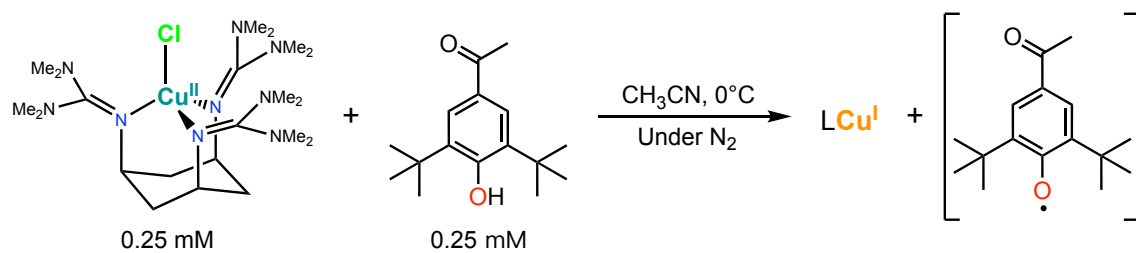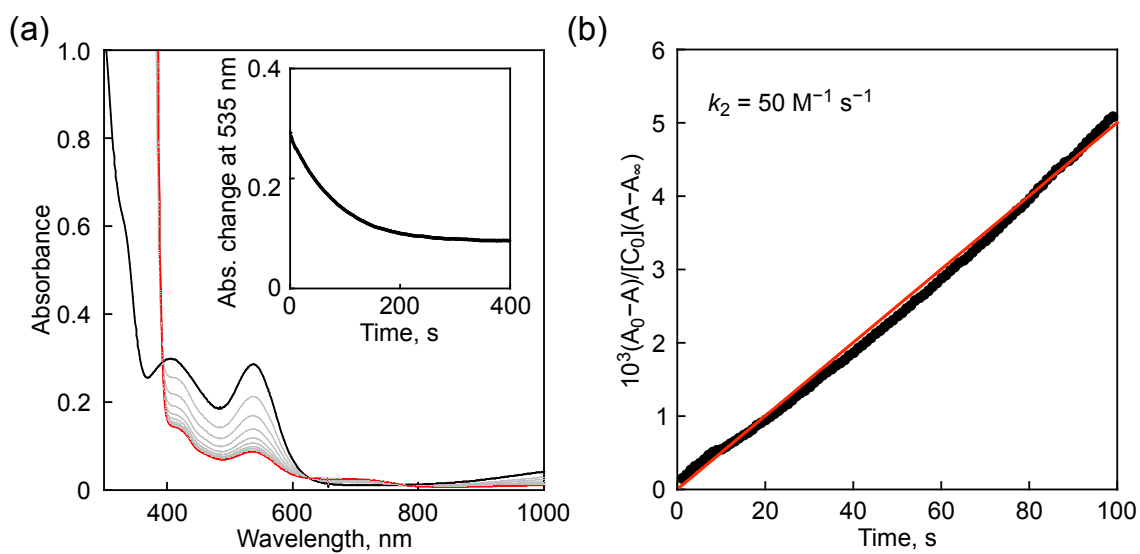

**Fig. S13** (a) UV-vis spectral changes for the reaction of **1**<sup>Cl</sup> (0.25 mM) with 4-COMe-2,6-di-*tert*-butylphenol (P<sup>COMe</sup>H, 0.25 mM) in CH<sub>3</sub>CN at 0°C. Inset: Absorption change at 535 nm. (b) Second-order plot based on the absorption change at 535 nm.

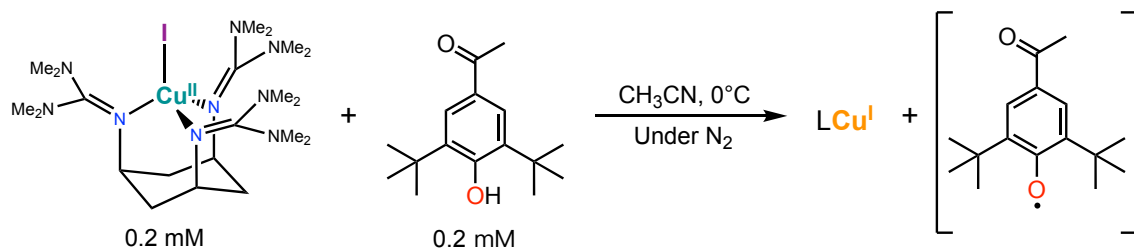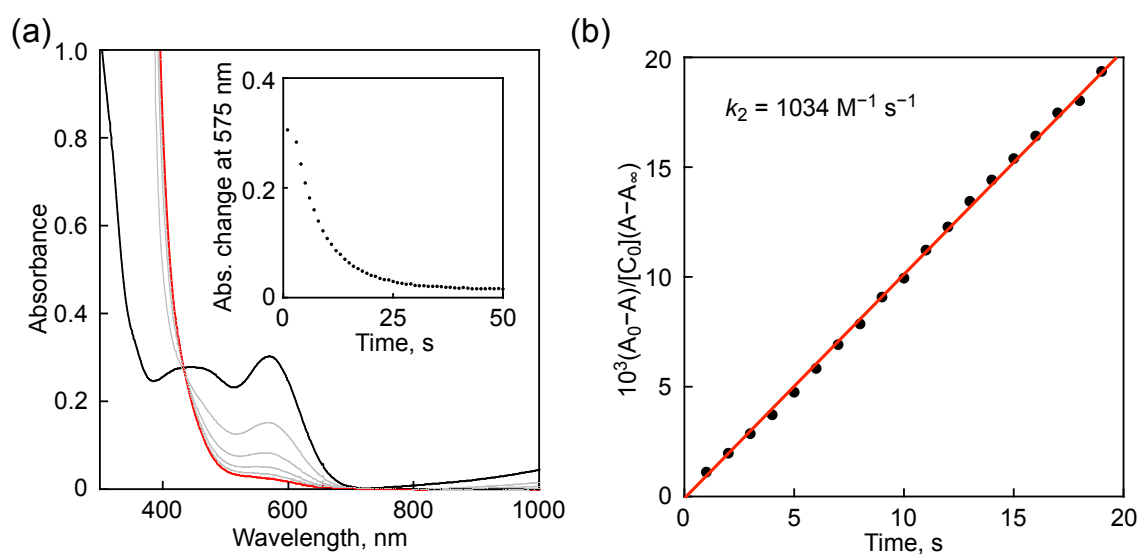

**Fig. S14** (a) UV-vis spectral change for the reaction of **1<sup>I</sup>** (0.2 mM) with 4-COMe-2,6-di-*tert*-butylphenol (**PCOMeH**, 0.2 mM) in  $\text{CH}_3\text{CN}$  at  $0^\circ\text{C}$ . Inset: Absorption change based on absorbance at 575 nm. (b) Second-order plot based on the absorption change at 575 nm.

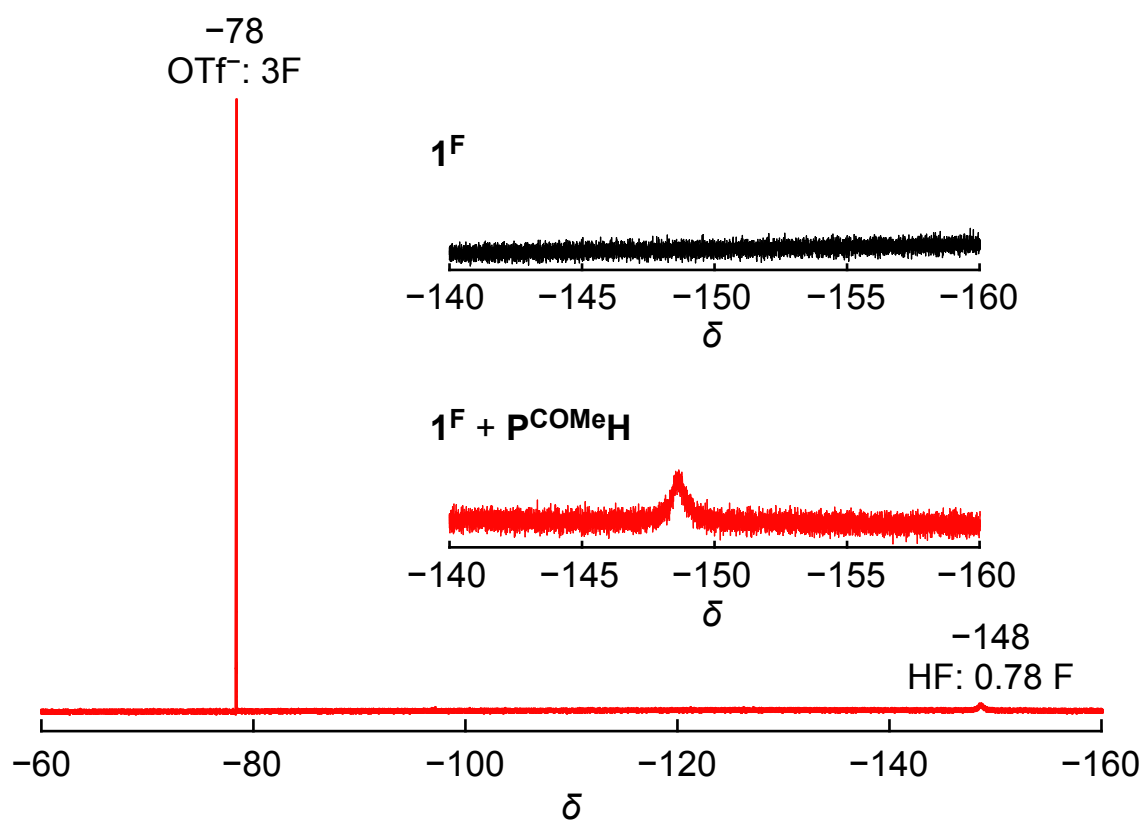

**Fig. S15**  $^{19}\text{F}$  NMR spectra of a post reaction solution of  $1^{\text{F}}$  and  $\text{P}^{\text{COMeH}}$  in  $\text{CH}_3\text{CN}$ . The yield of HF was determined by the integral ratio between  $\text{OTf}^-$  and HF.

- 1 *Purification of Laboratory Chemicals*, ed. by W. L. F. Armarego, Elsevier Science, **2017**.
- 2 Y. Lan, Y. Morimoto, I. Shimizu, H. Sugimoto, S. Itoh, *Inorg. Chem.* **2023**, *62*, 10539.
- 3 V. Raab, J. Kipke, O. Burghaus, J. Sundermeyer, *Inorg. Chem.* **2001**, *40*, 6964.
- 4 K. W. Kröckert, F. Garg, J. Heck, M. V. Heinz, J. Lange, R. Schmidt, A. Hoffmann, S. Herres-Pawlis, *Dalton Trans.* **2024**.
- 5 H. Wittmann, V. Raab, A. Schorm, J. Plackmeyer, J. Sundermeyer, *Eur. J. Inorg. Chem.* **2001**, *2001*, 1937.
- 6 D. T. Petasis, M. P. Hendrich, in *Electron Paramagnetic Resonance Investigations of Biological Systems by Using Spin Labels, Spin Probes, and Intrinsic Metal Ions, Pt A*, ed. by P. Z. Qin, K. Warncke, **2015**, Vol. 563, pp. 171.
